# Supplementary material
Source: Springer Nature journal article supplement (https://www.springermedizin.de/resource/supplementary/12950_2012_282_MOESM10_ESM.pdf/9557474)
Supplement: MOESM10 [file 9557474]

| Chemical                  | key factor |                      | NFKBIA |     | IL8 |     |     |
|---------------------------|------------|----------------------|--------|-----|-----|-----|-----|
|                           | genes      | CAS #                |        | %   | %   | %   |     |
|                           | (3 listed) | chemical group       | μM     |     |     |     |     |
|                           |            |                      | hours  | 4   | 20  | 4   | 20  |
| Genistein                 | FOS        | 446-72-0             | 0.5    | 80  | 57  | 18  | 54  |
|                           | CEBPB & D  | Isoflavones          | 5      | 71  | 56  | 12  | 66  |
|                           | PITX2      |                      | 50     | 53  | 27  | 3   | 11  |
| Quercetin                 | IL1B       | 117-39-5             | 2      | 92  | 61  | 86  | 90  |
|                           | NFKBIA     | Flavonols            | 20     | 111 | 75  | 86  | 92  |
|                           | F3         |                      | 200    | 241 | 52  | 19  | 26  |
| Indomethacin              | EGR1       | 53-86-1              | 1      | 106 | 66  | 86  | 93  |
|                           | NR4A1      | Indoles              | 10     | 123 | 129 | 86  | 101 |
|                           | NFKBIA     |                      | 100    | 261 | 108 | 19  | 42  |
|                           |            |                      | hours  | 3   | 6   | 3   | 6   |
| Curcumin                  | ETS2       | 458-37-7             | 1      | 186 | 111 | 275 | 138 |
|                           | CEBPB      | Diarylheptanoids     | 10     | 412 | 100 | 843 | 37  |
|                           | NFE2L2     |                      | 100    | 27  | 10  | 86  | 24  |
| Chenodeoxycholic Acid     | PPARG      | 474-25-9             | 1      | 217 | 145 | 291 | 317 |
|                           | NR4A1      | Bile Acids and Salts | 10     | 407 | 140 | 468 | 293 |
|                           | XBP1       |                      | 100    | 591 | 211 | 779 | 318 |
| Nordihydroguaiaretic Acid | HSD11B2    | 500-38-9             | 1      | 226 | 118 | 141 | 85  |
|                           | FOS        | Lignans              | 10     | 222 | 78  | 214 | 123 |
|                           | IL8        |                      | 100    | 15  | 6   | 2   | 1   |
| (E)-Guggulsterone         | NFKBIA     | 6439929              | 1      | 135 | 45  | 77  | 308 |
|                           | NFE2L2     | Plant Gums           | 5      | 96  | 32  | 69  | 139 |
|                           | STAT3      |                      | 50     | 21  | 8   | 21  | 13  |
| (Z)-Guggulsterone         | NFKBIA     | 6450278              | 1      | 75  | 43  | 23  | 176 |
|                           | NFE2L2     | Plant Gums           | 5      | 46  | 35  | 18  | 122 |
|                           | STAT3      |                      | 50     | 47  | 16  | 10  | 4   |
| Sodium Selenite           | JUNB       | 10102-18-8           | 10     | 83  | 31  | 96  | 44  |
|                           | FOS        | Selenium Compounds   | 100    | 100 | 37  | 115 | 37  |
|                           | PITX2      |                      | 1000   | 143 | 53  | 30  | 12  |
